# Supplementary material for: Heterochromatin-Driven Nuclear Softening Protects the Genome against Mechanical Stress-Induced Damage
Source: PubMed Central journal article supplement — Cell. 2020 May 14;181(4):800–817.e22. doi: 10.1016/j.cell.2020.03.052 (PMC7237863; doi:10.1016/j.cell.2020.03.052), 2020-05-14
Supplement: mmc4.pdf [file mmc4.pdf]

*qPCR Primers*

| <b>Gene</b> | <b>Forward</b>                                   | <b>Reverse</b>             |
|-------------|--------------------------------------------------|----------------------------|
| B2M         | GAGTATGCCTGCCGTGTGAA                             | GCTTACATGTCTCGATCCCCT      |
| DSC1        | CCACCCTCCAGTGAAAGTTATT                           | CTGATACCTTAAGCCTTCACCAC    |
| FLG         | GAGGGCACTGAAAGGCAAAA                             | CTTCCGTGCTGAGAGTGTCT       |
| GRHL3       | AGGCCATGATGAGAGTCAATG                            | CCTGGGACCCATGTAGTAATC      |
| HES1        | CGACACCGGATAAACCAAAGA                            | CGCGAGCTATCTTTCTTCAGAG     |
| HOXA5       | TCTCGTTGCCCTAATTCATCTTT                          | CATTCAGGACAAAGAGATGAACAGAA |
| KRT10       | GGCCTTGAAACAATCCCTGGAAGCC                        | AGTATTCTGGCACTCGGTTTCAGC   |
| KRT14       | GAGGACGCCACCTCTCCTCCT                            | CGAAGGACCTGCTCGTGGGTG      |
| OVOL1       | TTCAGTTACGGAAGCGGCC                              | CAGGCTGACTGGCACGTAGA       |
| PPL         | GAGAATGGAAGGAGCAGCCA                             | GGGTCACCTTCTACTTCCGGC      |
| SPRR2D      | TCGTTCCACAGCTCCACTTG                             | CAGGCCACAGGTTAAGGAGA       |
| TMEM79      | CAGTCGGTCCAGCTCTTTATTC                           | AGTAGATCAGCCGGGAGAC        |
| TP63        | GACAGGAAGGCGGATGAAGATAG                          | TGTTTCTGAAGTAAGTGCTGGTGC   |
| SUV39H1     | GCCCAAATCGTGTGGTACAG                             | CCTGACGGTCGTAGATCTGG       |
| Piezo 1     | GeneCopeia All-in-One <sup>TM</sup> qPCR Primers |                            |
| Piezo 1     | GeneCopeia All-in-One <sup>TM</sup> qPCR Primers |                            |

*ChIP primers*

| <b>Target</b>                | <b>Forward</b>       | <b>Reverse</b>       |
|------------------------------|----------------------|----------------------|
| Chr1:228,609,843-228,609,990 | GTGTAGGTGGGCGGTAAAG  | CAGAGTGCTGGGATTACAGG |
| Chr2:306,919-307,021         | GGGCGTTAATACACACACA  | GCCTCCTCGCTACCTGT    |
| Chr4:53,295-53,411           | GTTGGCTTCCGGGATCTG   | AGGCTGTGGCTGAATCAC   |
| Chr18: 25,534,154-25,534,332 | CTTCTCCCCACTCTTGGCAC | AGGAGGCAAAAGGACTCTGC |
| Chr18:37,043,795-37,043,847  | TCCTCCTTCTATGCCACCCA | GACACTGGGGAACGAGACAG |
| S26: chr20:3047993-3048069   | CTTACGTTTTGCCCTCTGC  | TGTACACACCGGCAGAACAG |
